# Supplementary material for: Ionic liquid-modulated preparation of hexagonal tungsten trioxide mesocrystals for lithium-ion batteries
Source: Royal Society of Chemistry journal article supplement (doi:10.1039/c4nr05717a), 2014-12-15
Supplement: c4nr05717a1.pdf [file c4nr05717a1.pdf]

COMMUNICATION

## Ionic liquid-modulated preparation of hexagonal tungsten trioxide mesocrystals for lithium-ion batteries

Xiaochuan Duan, Songhua Xiao, Lingling Wang, Hui Huang, Yuan Liu, QiuHong Li and Taihong Wang\*

### Experimental Section

#### Materials

1-*n*-butyl-3-methyl imidazolium acetate ([Bmim][CH<sub>3</sub>COO]) was obtained from Lanzhou Greenchem ILS, LICP. CAS. China. Other chemicals were purchased and used without further purification. The water used was deionized.

#### Synthesis of hexagonal tungsten trioxide (h-WO<sub>3</sub>) mesocrystal

In the typical synthesis procedure, 5 mL of [Bmim][CH<sub>3</sub>COO] was put into 20 mL of deionized water under stirring to form a homogenous solution. Subsequently, 2.7 g of H<sub>2</sub>C<sub>2</sub>O<sub>4</sub> (0.03 mol) was added into the above homogenous solution under continuous stirring. then 0.33 g of Na<sub>2</sub>WO<sub>4</sub>·2H<sub>2</sub>O (1 mmol) was added into the solution and continued to stir for 10 min, the total solution was transferred into a stainless-steel autoclave with a capacity of 33 mL, sealed and heated at 180 °C for 24 h. When the reaction was completed, the autoclave was cooled to room temperature naturally. The resultant product was collected and washed with deionized water and anhydrous ethanol for several times. The final product was dried in a vacuum at 80 °C for 3 h. Varying the amount of [Bmim][CH<sub>3</sub>COO] could produce h-WO<sub>3</sub> with different morphologies. The synthetic conditions for preparing the typical samples are summarized in Table S1.

#### Characterizations

The products were characterized by XRD, SEM, TEM and HR-TEM measurements. XRD measurements were performed on a Rigaku D/max 2500 diffractometer with Cu K $\alpha$  radiation ( $\lambda$ = 0.154056 nm) at V= 40 kV and I = 150 mA, and the scanning speed was 8°/min. Morphology observations were performed on a Hitachi S4800 field emission scanning electron microscope (FE-SEM). TEM and HR-TEM images were recorded with a Tecnai G2 20S-Twin transmission electron microscope operating at an accelerating voltage of 120 kV.

#### Electrochemical Test

Electrochemical studies were characterized in CR2016-type coin cell with a multi-channel current static system Arbin (Arbin Instruments BT 2000, USA). The working electrodes were prepared by a slurry coating method on a copper foil with 80 wt% active material (h-WO<sub>3</sub>), 10 wt% acetylene black, and 10 wt% polyvinylidene fluoride (PVDF) dispersed in *N*-methyl-2-pyrrolidone (NMP). Test cells were assembled in an argon-filled glove box with water and oxygen contents less than 1 ppm using Li foil as the combined reference and counter electrode and polypropylene film (Celgard 2400) as separator. The electrolyte was 1 M LiPF<sub>6</sub> in a 1:1 (V/V) mixture of ethylene carbonate (EC) and dimethyl carbonate (DMC). The cells were galvanostatically discharge-charged at different current density between 0.01 and 3 V at the room temperature. Cyclic voltammetry (CV) was conducted on an electrochemical workstation (CHI660E) at a scan rate of 0.1 mV s<sup>-1</sup> from 0.01 to 3.0 V.

**Table S1.** Summary of the Experimental Parameters and Their Corresponding Morphologies of Hexagonal WO<sub>3</sub> Obtained under Different Conditions.

| No. | n(Na <sub>2</sub> WO <sub>4</sub> ·2H <sub>2</sub> O)<br>(mmol) | n(H <sub>2</sub> C <sub>2</sub> O <sub>4</sub> )<br>(mol) | V([Bmim][CH <sub>3</sub> COO])<br>(mL) | Morphology             |
|-----|-----------------------------------------------------------------|-----------------------------------------------------------|----------------------------------------|------------------------|
| S1  | 1                                                               | 0.03                                                      | 0                                      | spherical polycrystal  |
| S2  | 1                                                               | 0.03                                                      | 5                                      | biconical mesocrystal  |
| S3  | 1                                                               | 0.03                                                      | 10                                     | rodlike single-crystal |

All the reactions were conducted at 180 °C for 24 h.

**Table S2.** Summary of Refined Cell Parameters of the Samples and JCPDS Card 33-1387.

| No.      | <i>a</i> (Å) | <i>b</i> (Å) | <i>c</i> (Å) | <i>α</i> | <i>β</i> | <i>γ</i> | volume (Å <sup>3</sup> ) |
|----------|--------------|--------------|--------------|----------|----------|----------|--------------------------|
| Standard | 7.298        | 7.298        | 3.899        | 90       | 90       | 120      | 179.84                   |
| S1       | 7.29386      | 7.29386      | 3.88869      | 90       | 90       | 120      | 179.16                   |
| S2       | 7.29352      | 7.29352      | 3.88845      | 90       | 90       | 120      | 179.15                   |
| S3       | 7.28235      | 7.28235      | 3.87831      | 90       | 90       | 120      | 179.12                   |

Cell parameters indexed using MDI Jade

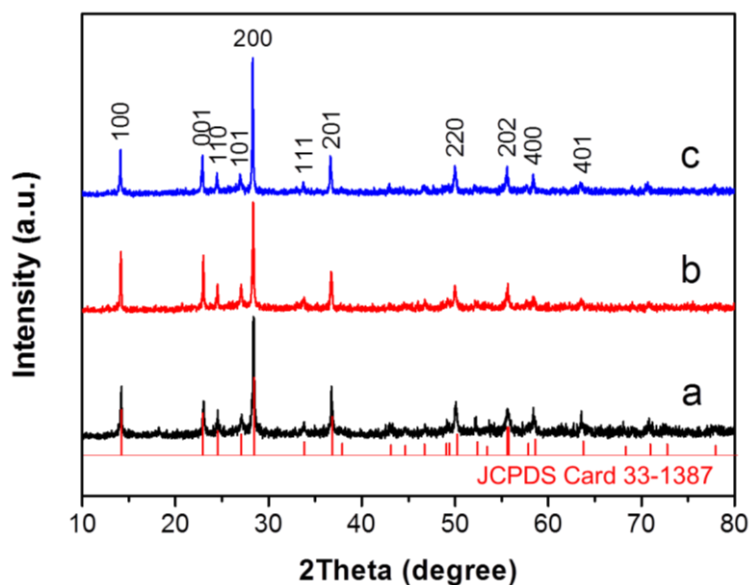**Figure S1.** XRD patterns of as-synthesized hexagonal tungsten trioxides with different morphologies: (a) S1, spherical polycrystal; (b) S2, biconical mesocrystal; (c) S3, rodlike single-crystal. All of the diffraction peaks can be indexed to the hexagonal structure of tungsten trioxide, which are consistent with the reported values (JCPDS Card 33-1387).

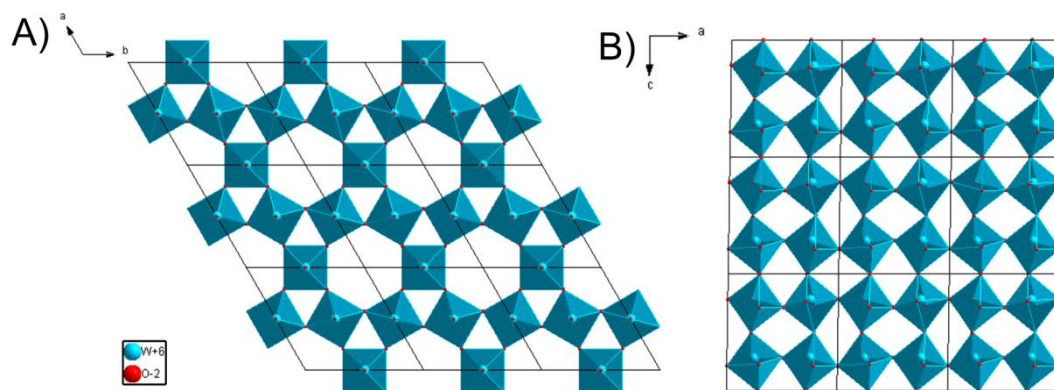

**Figure S2.** Structural illustrations of (A) hexagonal tungsten trioxide and (B) monoclinic tungsten trioxide ( $3 \times 3 \times 3$  cells).

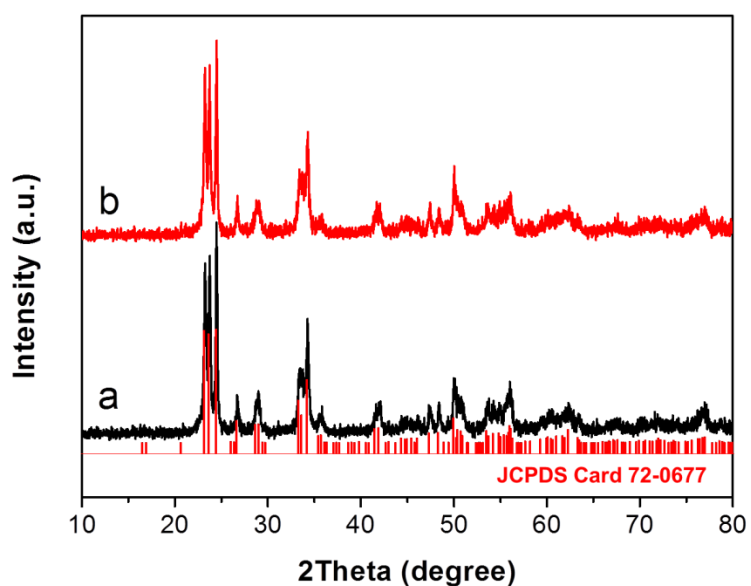

**Figure S3.** XRD patterns of as-synthesized monoclinic tungsten trioxides in the presence of different inorganic acid: (a) nitric acid; (b) hydrochloric acid. All of the diffraction peaks can be indexed to the monoclinic structure of tungsten trioxide, which are consistent with the reported values (JCPDS Card 72-0677).

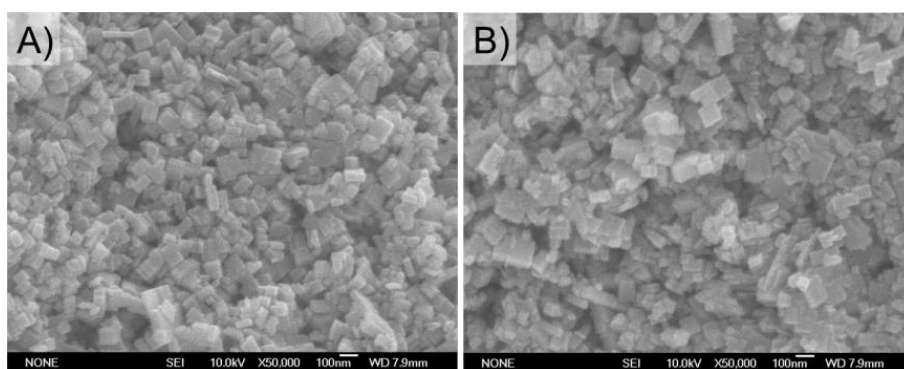

**Figure S4.** SEM images of as-synthesized monoclinic WO<sub>3</sub> nanoplates in the presence of different inorganic acid: (a) nitric acid; (b) hydrochloric acid.

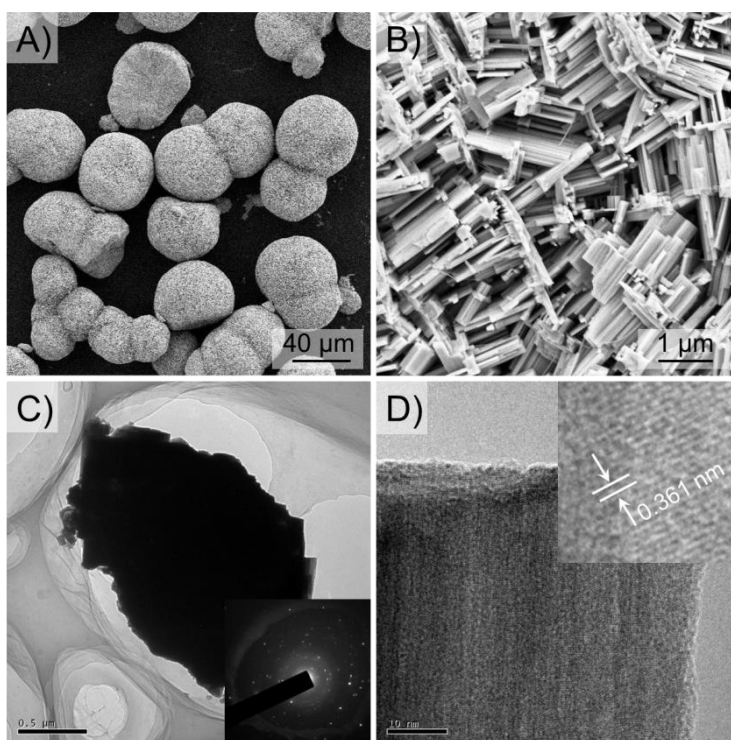

**Figure S5.** (A) Low- and (B) high-magnification SEM images, (C) low-magnification and (F) corresponding HRTEM images of as-prepared h-WO<sub>3</sub> spherical polycrystals.

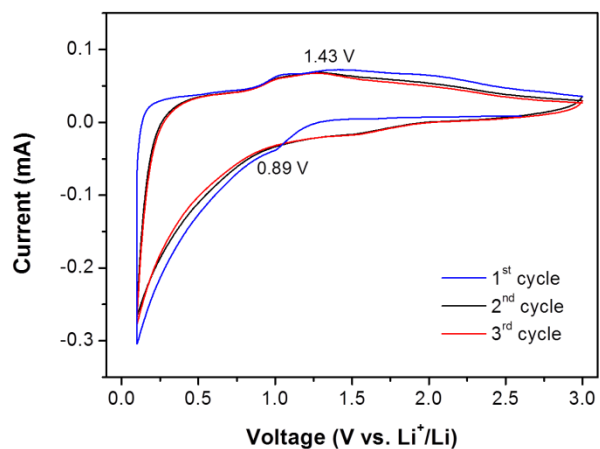

**Figure S6.** Cyclic voltammetry curves of h-WO<sub>3</sub> biconical mesocrystalline electrodes at a rate of 0.1 mV/s for the first 3 cycles.

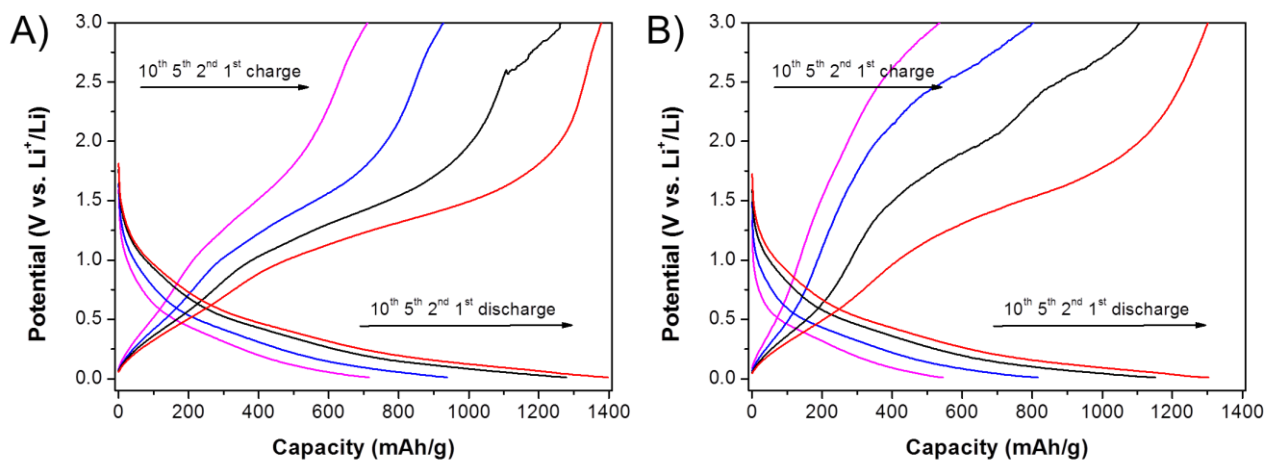

**Figure S7.** Galvanostatic charge-discharge profiles of h-WO<sub>3</sub> electrodes measured at 50 mA/g current density in the potential range of 0.01-3.0 vs. Li<sup>+</sup>/Li: (A) rodlike single-crystals; (B) spherical polycrystals.

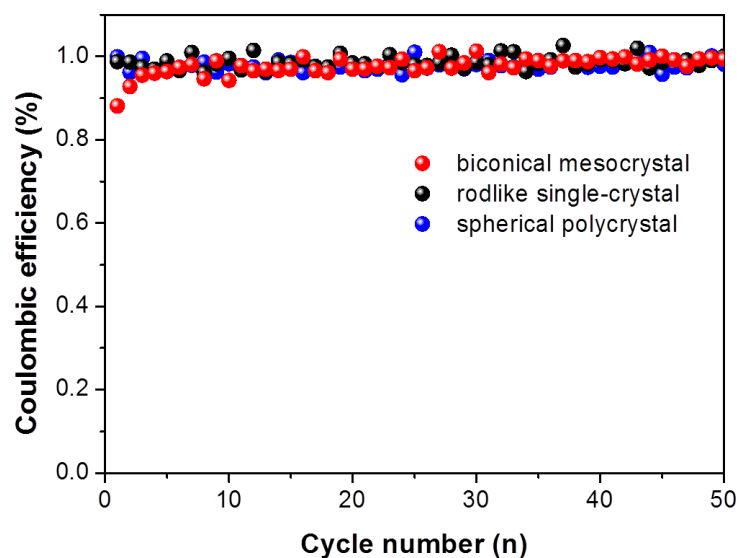

**Figure S8.** Coulombic efficiency versus cycle number plots of as-prepared h-WO<sub>3</sub> electrodes with different morphologies and crystal forms at 50 mA/g current density.

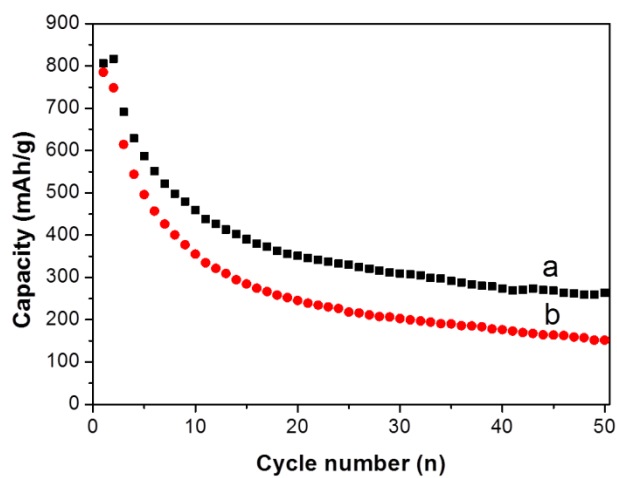

**Figure S9.** Cycling performance of as-synthesized monoclinic WO<sub>3</sub> nanoplates in the presence of different inorganic acid: (a) nitric acid; (b) hydrochloric acid. The current density is 50 mA/g.
